# Supplementary material for: Refining Compression Therapy for the Prevention of Peripheral Neuropathy in Breast Cancer Patients: Sub- analyses of a Patient Survey
Source: Research Square preprint supplement (doi:10.21203/rs.3.rs-6909732/v1), 2025-07-01
Supplement: Supplementary file 1 [file 3862ac1aba1fe70a6c8a0eed.docx]

**Appendix 1.** Comments on hand compression therapy

| No. | Comments |
| --- | --- |
| 1 | None |
| 2 | “I found it difficult to put on the gloves.” |
| 3 | “When I gloved, the second one was hard.” |
| 4 | None |
| 5 | “The skin on my hands was peeling and it was hard to put on.” |
| 6 | None |
| 7 | “The nurses always helped me take it off.” |
| 8 | “It was difficult to put on the second one, but I learned to put it on as soon as I arrived at the chemotherapy room and it went smoothly.” |
| 9 | None |
| 10 | “It's hard to put it on. It's uncomfortable because it doesn't fit me.” |

**Appendix 2.** Comments on foot compression therapy

| No. | Comments |
| --- | --- |
| 1 | None |
| 2 | “Easier than gloves.” |
| 3 | “It was a little difficult to put on the second one. It was also a little hard to take it off.” |
| 4 | “I could have put it on by myself if my hand nails didn’t hurt.” |
| 5 | “It was hard to get undressed.” |
| 6 | “Maybe it was a little painful because my body temperature rose when the room temperature was high.” |
| 7 | “It was hard for me to take it off by myself, so the nurse helped me. I think it would be good to have a return bag.” |
| 8 | “It was rather pleasant. I think the pressure therapy on my hands and feet helped to lighten the numbness. If I had bought it myself, the price would have been reasonable, and it helped me financially. Thank you very much.” |
| 9 | None |
| 10 | “It was hard to put on two sheets.” |
