# Supplementary material for: Refining Compression Therapy for the Prevention of Peripheral Neuropathy in Breast Cancer Patients: Sub- analyses of a Patient Survey
Source: Research Square preprint supplement (doi:10.21203/rs.3.rs-6909732/v1), 2025-07-01
Supplement: Supplementary file 1 [file 7647e1f2511d602b3d509282.pdf]

## Compression Therapy Questionnaire

Please complete the following questionnaire and return it to your physician.

### Upper Limbs

1. Did you feel pressure in your fingertips?  
☐ Yes ☐ Slightly ☐ Almost none ☐ None
2. Did you experience any pain in your hands?  
☐ Yes ☐ Slightly ☐ Almost none ☐ None
3. Did you experience any itchiness in your hands?  
☐ Yes ☐ Slightly ☐ Almost none ☐ None
4. How difficult was the compression therapy for your hands?

Please rate on a scale from 1 to 10:

1 = Not difficult at all

10 = Extremely difficult / unbearable

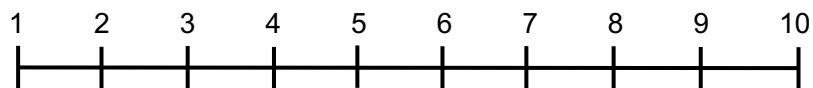

5. Please write any comments or suggestions regarding hand compression therapy.  
(Examples: It was uncomfortable, hard to wear, etc.)

---

---

### Lower Limbs

6. Did you feel pressure in your toes?  
☐ Yes ☐ Slightly ☐ Almost none ☐ None
7. Did you feel pressure in your ankles?  
☐ Yes ☐ Slightly ☐ Almost none ☐ None
8. Did you feel pressure in your calves?  
☐ Yes ☐ Slightly ☐ Almost none ☐ None

9. Did you experience any pain in your feet or legs?

☐ Yes ☐ Slightly ☐ Almost none ☐ None

10. Did you experience any itchiness in your feet or legs?

☐ Yes ☐ Slightly ☐ Almost none ☐ None

11. How was the process of wearing and removing the compression stockings?

☐ Very easy

☐ Manageable

☐ Difficult, but I could do it myself

☐ I needed assistance

12. How difficult was the compression therapy for your feet and legs?

Please rate on a scale from 1 to 10:

1 = Not difficult at all

10 = Extremely difficult / unbearable

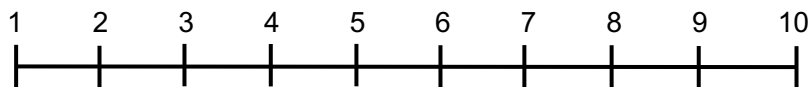

13. Please write any comments or suggestions regarding foot/leg compression therapy.

(Examples: It was uncomfortable, hard to wear, etc.)

---

---

Thank you for your cooperation.
